# Supplementary material for: Impacts of shipping emissions on PM 2.5 pollution in China
Source: Copernicus journal article supplement (doi:10.5194/acp-18-15811-2018), 2018-11-02
Supplement: Supplementary file 1 [file acp-18-15811-2018-supplement.pdf]

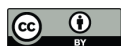

*Supplement of*

## **Impacts of shipping emissions on PM<sub>2.5</sub> pollution in China**

**Zhaofeng Lv et al.**

*Correspondence to:* Huan Liu ([liu\\_env@tsinghua.edu.cn](mailto:liu_env@tsinghua.edu.cn))

The copyright of individual parts of the supplement might differ from the CC BY 4.0 License.

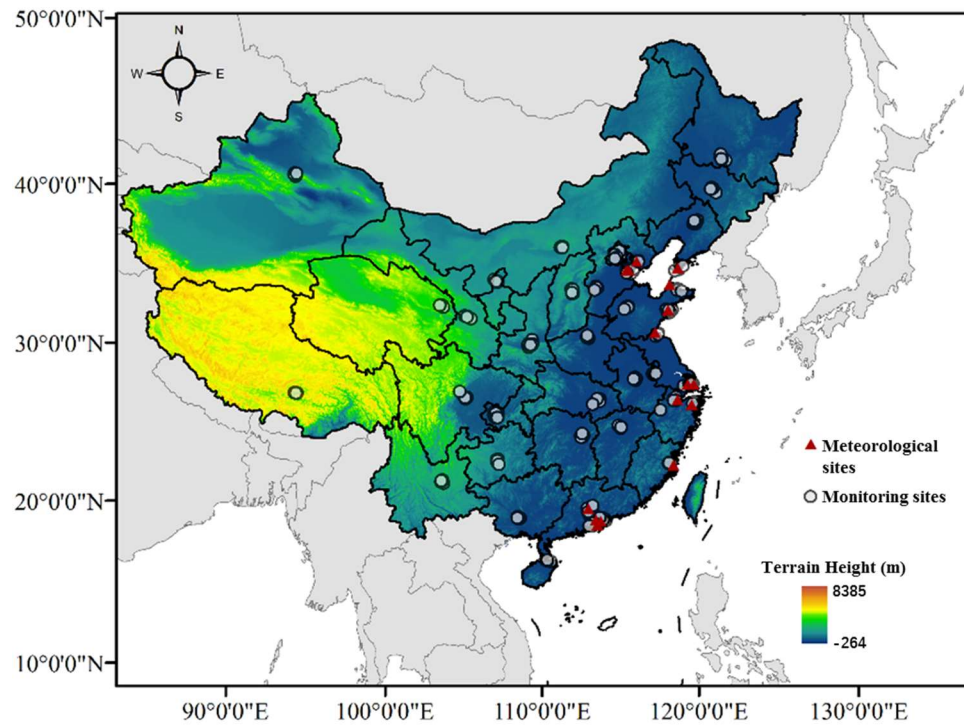

**Figure S1.** Terrain height and locations of the selected monitoring sites and metrological sites in China

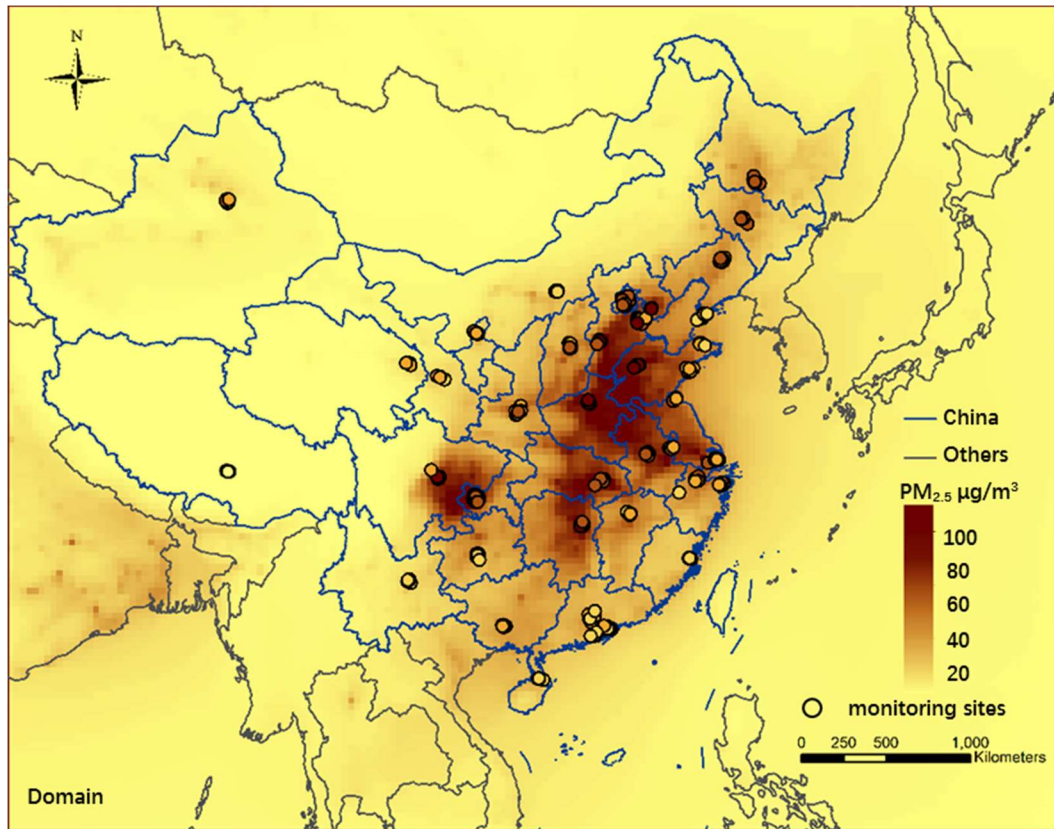

**Figure S2.** Spatial validation of the predicted PM<sub>2.5</sub> annual mean concentrations. The gridded background color represented the predicted concentrations. The color of points showed the observed concentrations.

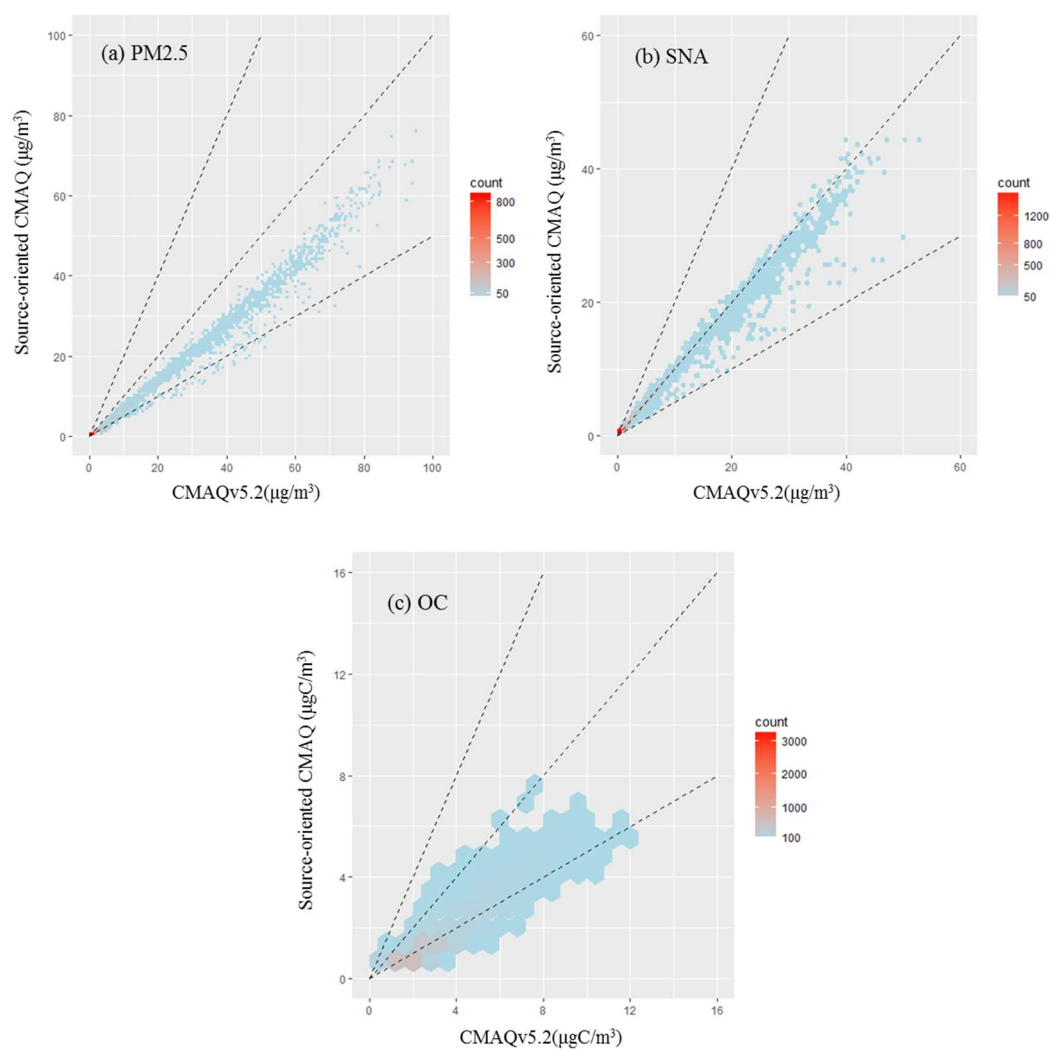

**Figure S3.** Comparison of the monthly mean concentrations in summer predicted by CMAQ version 5.2 and the source-oriented CMAQ at all grids within China, including: (a) PM<sub>2.5</sub> (b) SNA (c) OC.

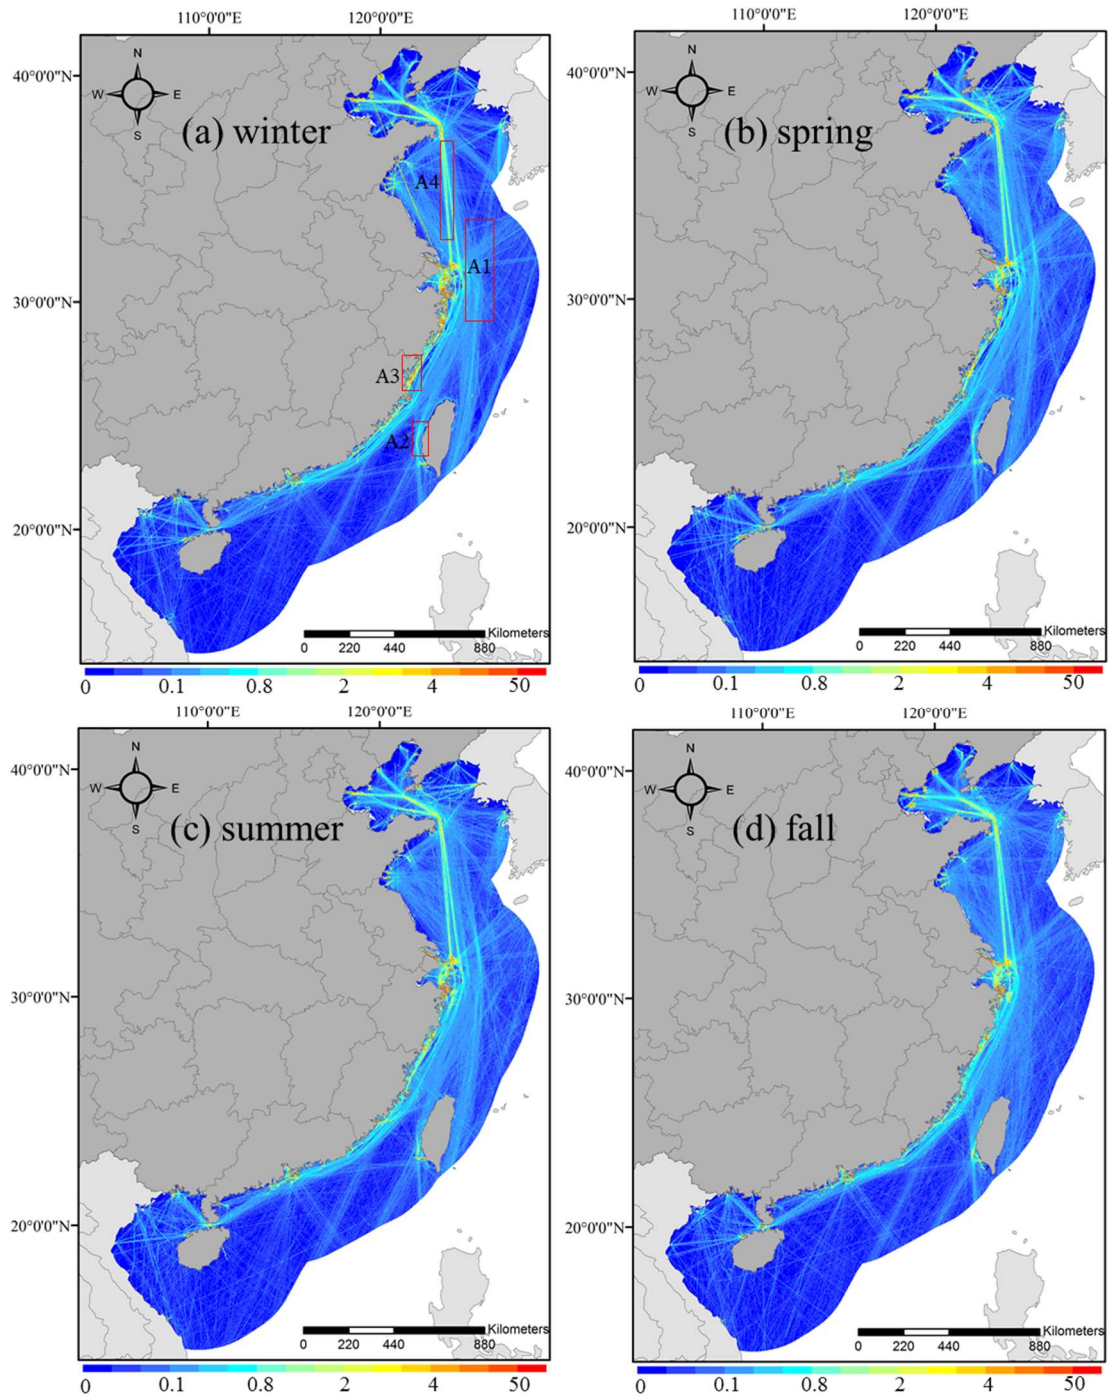

**Figure S4.** Spatial distributions of SO<sub>2</sub> emissions from cargo ships at a resolution of 3 km×3 km (unit, ton/grid) in (a) winter; (b) spring; (c) summer; and (d) fall.



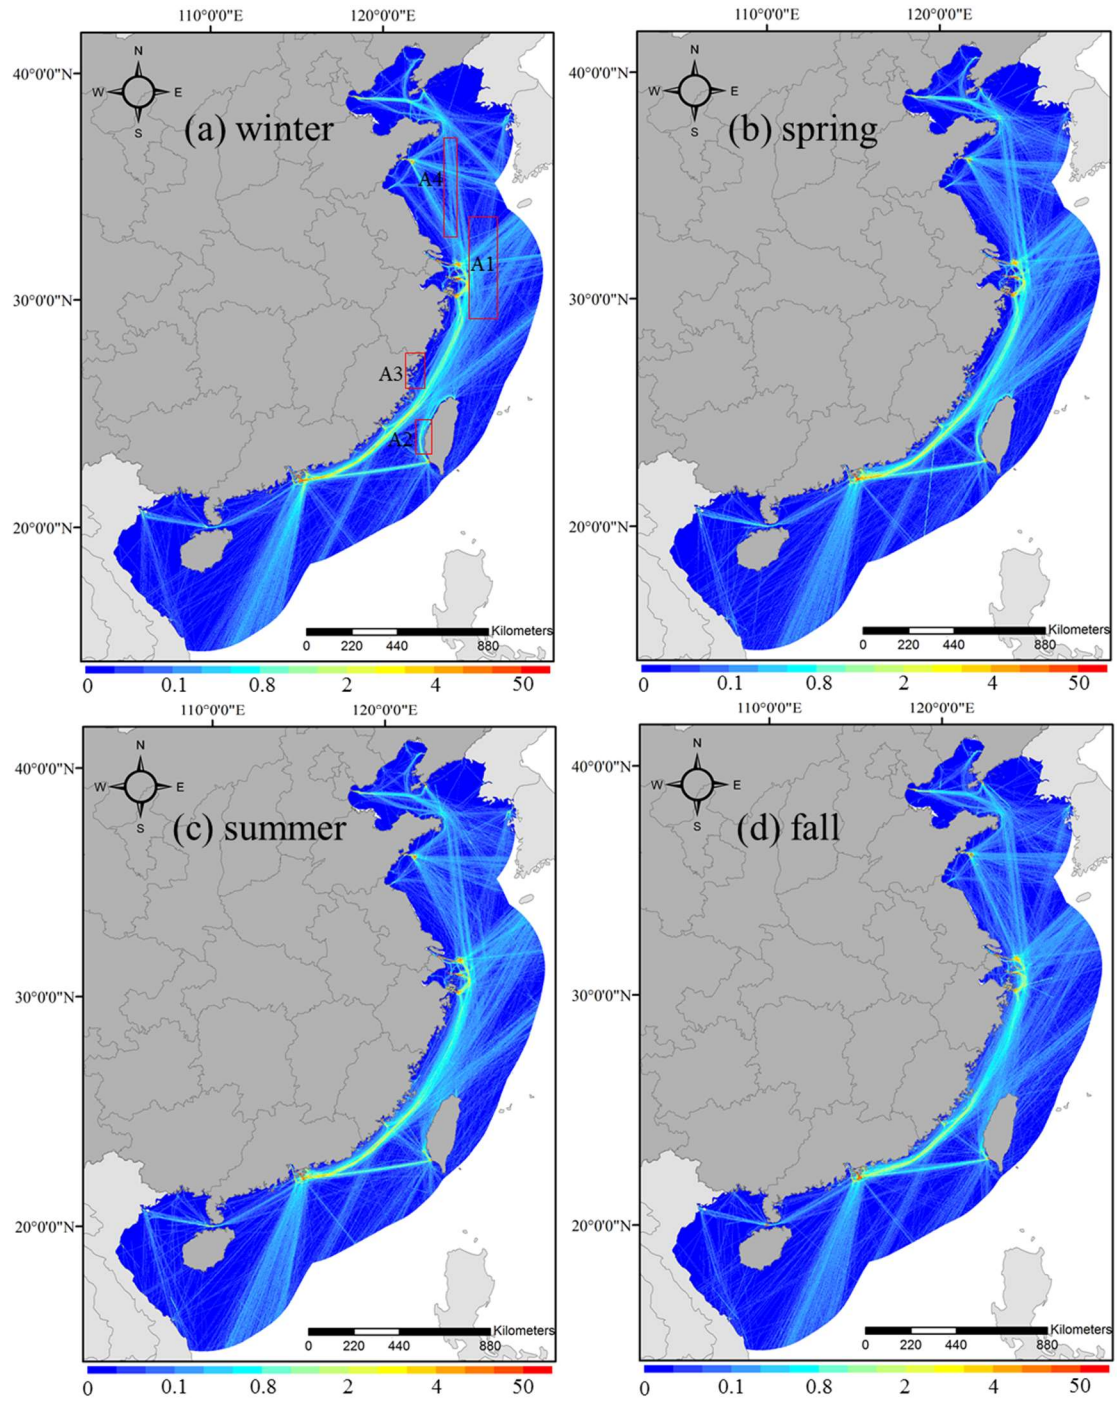

**Figure S5.** Spatial distributions of SO<sub>2</sub> emissions from containers at a resolution of 3 km×3 km (unit, ton/grid) in (a) winter; (b) spring; (c) summer; and (d) fall.

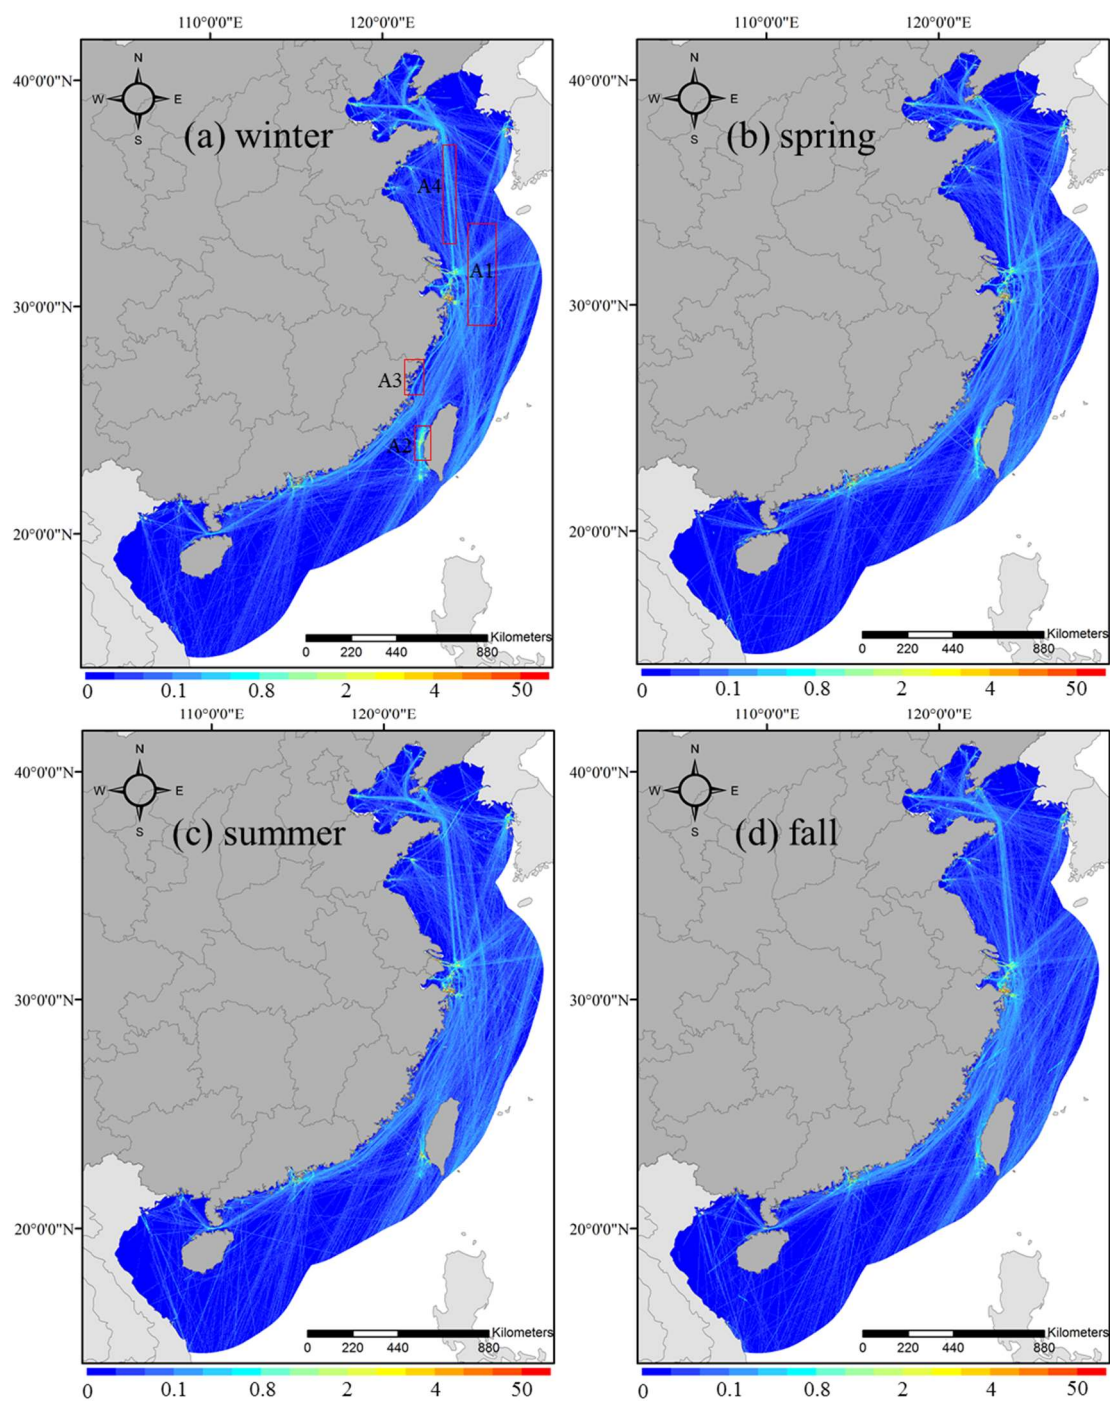

**Figure S6.** Spatial distributions of SO<sub>2</sub> emissions from tankers at a resolution of 3 km×3 km (unit, ton/grid) in (a) winter; (b) spring; (c) summer; and (d) fall.

**Table S1.** Ship types

| Ship type         |                      | Description (Liu et al., 2016)                                                                                                                    |
|-------------------|----------------------|---------------------------------------------------------------------------------------------------------------------------------------------------|
| <b>Cargo ship</b> | Auto Carrier         | Self-propelled dry-cargo vessels that carry containerized automobiles.                                                                            |
|                   | Bulk Carrier         | Self-propelled dry-cargo ship that carries loose cargo.                                                                                           |
|                   | General Cargo        | Self-propelled cargo vessel that carries a variety of dry cargo.                                                                                  |
|                   | Reefer               | Self-propelled dry-cargo vessels that often carry perishable items.                                                                               |
| <b>Container</b>  | Container Ship       | Self-propelled dry-cargo vessel that carries containerized cargo.                                                                                 |
| <b>Tanker</b>     | Tanker               | Self-propelled liquid-cargo vessels including chemical tankers, oil tankers, liquefied gas tanker, etc.                                           |
| <b>Others</b>     | Cruise Ship          | Self-propelled cruise ships.                                                                                                                      |
|                   | Miscellaneous        | Category for those vessels that do not fit into one of the other categories or are unidentified, including harbor service vessels, fishing boats. |
|                   | Oceangoing Tugs/Tows | Self-propelled tugboats and towboats that tow/push cargo or barges in the open ocean.                                                             |
|                   | RORO                 | Self-propelled vessel that handles cargo that is rolled on and off the ship, including ferries.                                                   |



**Table S2.** Convert factors from total HC (THC) emissions of shipping to lumped species in CB05 mechanism

| Lumped Species | Convert factor (moles/kg THC) |
|----------------|-------------------------------|
| PAR            | 43.92                         |
| OLE            | 0.70                          |
| TOL            | 0.65                          |
| XYL            | 0.79                          |
| FORM           | 0.01                          |
| ALD2           | 0.00                          |
| ETH            | 0.01                          |
| ISOP           | 0.00                          |
| MEOH           | 0.00                          |
| ETOH           | 0.01                          |
| ETHA           | 0.00                          |
| IOLE           | 0.26                          |
| ALDX           | 0.11                          |
| TERP           | 0.00                          |
| UNR            | 4.66                          |

**Table S3.** Convert factors from total HC (THC) emissions of shipping to lumped species in SAPRC-07 mechanism

| Lumped Species | Convert factor (moles/kg THC) |
|----------------|-------------------------------|
| ACET           | 1.02                          |
| ALK1           | 0.80                          |
| ALK2           | 0.08                          |
| ALK3           | 0.31                          |
| ALK4           | 1.25                          |
| ALK5           | 3.49                          |
| ARO1           | 0.69                          |
| ARO2           | 0.79                          |
| BACL           | 0.00                          |
| BALD           | 0.00                          |
| CCHO           | 0.00                          |
| CRES           | 0.00                          |
| ETHE           | 0.00                          |
| GLY            | 0.00                          |
| HCHO           | 0.00                          |
| IPRD           | 0.00                          |
| ISOP           | 0.00                          |
| MACR           | 0.11                          |
| MEK            | 0.00                          |
| MEOH           | 0.00                          |
| MGLY           | 0.00                          |
| MVK            | 0.00                          |
| OLE1           | 0.63                          |
| OLE2           | 0.28                          |
| PHEN           | 0.00                          |
| PRD2           | 0.08                          |
| RCHO           | 0.00                          |
| TERP           | 0.00                          |

**Table S4.** Statistics for meteorological predictions

| Statistics          | Jan  | Apr  | Jul  | Oct  | Annual |
|---------------------|------|------|------|------|--------|
| <b>T2 (°C)</b>      |      |      |      |      |        |
| MB                  | -1.0 | -0.7 | -0.3 | -0.9 | -0.7   |
| NMB (%)             | -15  | -4   | -1   | -4   | -6     |
| NME (%)             | 16   | 12   | 6    | 8    | 10     |
| R                   | 0.9  | 0.9  | 0.9  | 0.9  | 0.9    |
| <b>WS10 (m/s)</b>   |      |      |      |      |        |
| MB                  | -0.4 | -0.9 | -1.1 | -0.8 | -0.8   |
| NMB (%)             | -9   | -21  | -28  | -23  | -20    |
| NME (%)             | 32   | 35   | 38   | 38   | 36     |
| R                   | 0.7  | 0.6  | 0.7  | 0.7  | 0.7    |
| <b>WD10(degree)</b> |      |      |      |      |        |
| MB                  | 4.5  | 2.8  | 0.4  | 4.0  | 3.0    |
| NMB (%)             | 2    | 1    | 0    | 2    | 1      |
| NME (%)             | 18   | 16   | 18   | 21   | 18     |
| R                   | 0.4  | 0.5  | 0.5  | 0.5  | 0.5    |
| <b>RH(%)</b>        |      |      |      |      |        |
| MB                  | 2.6  | 4.8  | 0.9  | 3.0  | 2.8    |
| NMB (%)             | 4    | 8    | 1    | 4    | 4      |
| NME (%)             | 17   | 19   | 11   | 14   | 15     |
| R                   | 0.8  | 0.8  | 0.8  | 0.8  | 0.8    |

MB, mean biases; NMB, normalized mean biases; NME, normalized mean errors; R, correlation coefficients.

**Table S5.** Statistics for PM<sub>2.5</sub> concentration

| Statistics                                        | Jan   | Apr  | Jul  | Oct  | Annual |
|---------------------------------------------------|-------|------|------|------|--------|
| <b>Hourly PM<sub>2.5</sub> (µg/m<sup>3</sup>)</b> |       |      |      |      |        |
| Mean OBS                                          | 90.4  | 50.7 | 38.1 | 53.0 | 58.3   |
| Mean SIM                                          | 118.8 | 60.3 | 52.4 | 72.3 | 76.2   |
| MB                                                | 29.5  | 10.0 | 14.1 | 19.4 | 18.3   |
| NMB (%)                                           | 30    | 20   | 42   | 37   | 32     |
| NME (%)                                           | 67    | 69   | 87   | 77   | 75     |
| MFB (%)                                           | 14    | -1   | 14   | 17   | 11     |
| MFE (%)                                           | 52    | 57   | 61   | 60   | 57     |
| R                                                 | 0.5   | 0.4  | 0.3  | 0.5  | 0.4    |

Mean OBS, monthly average of observations; Mean SIM, monthly average of simulations; MB, mean biases; NMB, normalized mean biases; NME, normalized mean errors; MFB, mean fractional bias; MFE, mean fractional error; R, correlation coefficients.

**Reference:**

Liu, H., Fu, M., Jin, X., Shang, Y., Shindell, D., Faluvegi, G., Shindell, C., and He, K.: Health and climate impacts of ocean-going vessels in East Asia, *Nature Climate Change*, 6, 1037-1041, 10.1038/nclimate3083, 2016.
